# Supplementary material
Source: PubMed Central journal article supplement (PMC9206866)
Supplement: NIHMS1811193-supplement-Appendix_B.pdf [file NIHMS1811193-supplement-Appendix_B.pdf]

## Supplementary material for

# Conventional finite element models estimate the strength of metastatic human vertebrae despite alterations of the bone's tissue and structure

Marc A. Stadelmann <sup>a</sup>, Denis E. Schenk <sup>a</sup>, Ghislain Maquer <sup>a</sup>, Christopher Lenherr <sup>a</sup>, Florian M. Buck <sup>b</sup>, Dieter D. Bosshardt <sup>c</sup>, Sven Hoppe <sup>d</sup>, Nicolas Theumann <sup>e</sup>, Ron N. Alkalay <sup>f</sup>, Philippe K. Zysset <sup>a,\*</sup>

*a* ARTORG Center for Biomedical Engineering Research, University of Bern, Bern, Switzerland

*b* University of Zurich & MRI Schulthess Clinic, Zurich, Switzerland

*c* Robert K. Schenk Laboratory of Oral Histology, School of Dental Medicine, University of Bern, Switzerland

*d* Department of Orthopedic Surgery, Inselspital, Bern University Hospital, Switzerland

*e* Clinique Bois-Cerf, Radiology Department, Lausanne, Switzerland

*f* Center for Advanced Orthopedic Studies, Beth Israel Deaconess Medical Center and Harvard Medical School, Boston, USA

\* Email address: [philippe.zysset@artorg.unibe.ch](mailto:philippe.zysset@artorg.unibe.ch)

URL: [www.artorg.unibe.ch](http://www.artorg.unibe.ch)

## Description:

- Eleven cadaver spines (3 female, 8 male, age 49 to 71, mean 54) were obtained through the Anatomy Gifts Registry from donors with known history of solid primary tumors (3 breast, 3 lung, 2 prostate, 2 kidney, 1 esophageal).
- All soft tissues were removed. Each vertebra was separated by cutting through the discs and the posterior elements were cut at the pedicles. Both endplates were cut under water irrigation, resulting in plano-parallel vertebral body sections.
- Each vertebral section was scanned via  $\mu$ CT at 24.5  $\mu$ m. High-frequency noise was reduced with a Gauss filter and a custom script was used to generate a mask separating the bone from its background.
- This document presents :
  - a photograph of each vertebral section (if available).
  - midplane slices taken from the corresponding  $\mu$ CT in 3 orthogonal planes.
  - pseudo-Xray images generated by projecting the  $\mu$ CT on 3 orthogonal planes.

## Notes:

- Sample X 123: the letter refers to the spine, the digits to the vertebral section.
- Please find the demographics and primary tumor of the donors in the **Table 1 of the publication**.
- Please find the spinal level, lesion type, bone volume ratio, experimental strength ( $F_{exp}$ ),  $\mu$ FE stiffness ( $K_{\mu FE}$ ), bone mineral content (BMC), and hFE strength ( $F_{hFE}$ ) in the **Table 4 of the publication**.

## Sample D 164

Lesion type:

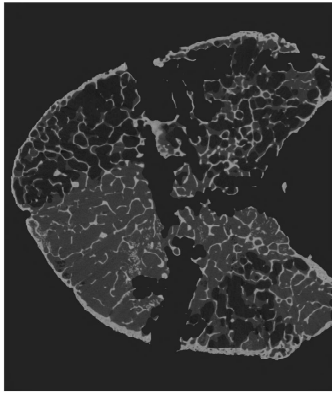

Midplane direction 1

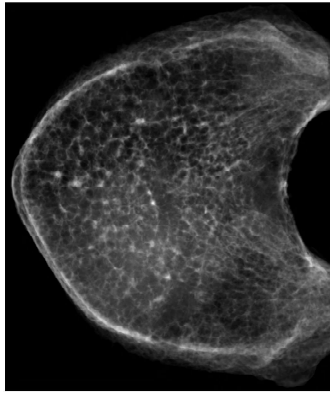

X-ray direction 1

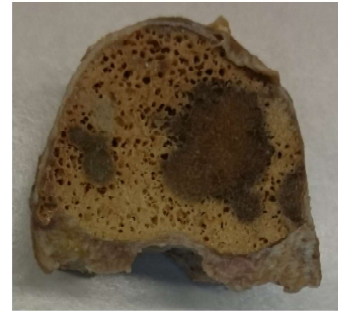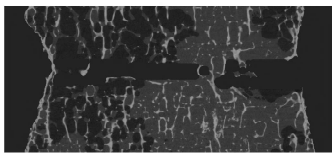

Midplane direction 2

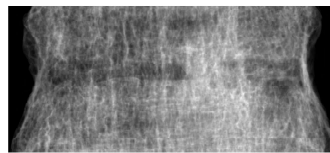

X-ray direction 2

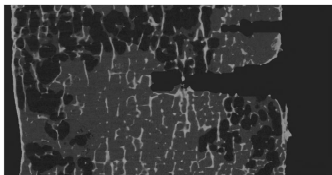

Midplane direction 3

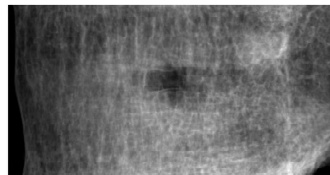

X-ray direction 3

## Sample D 168

Lesion type:

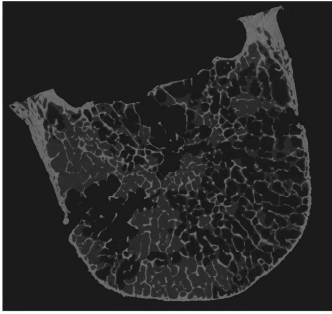

Midplane direction 1

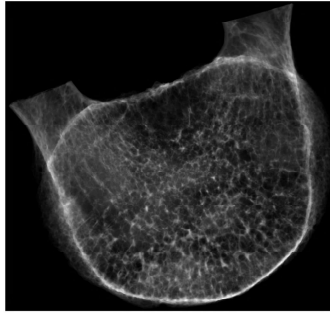

X-ray direction 1

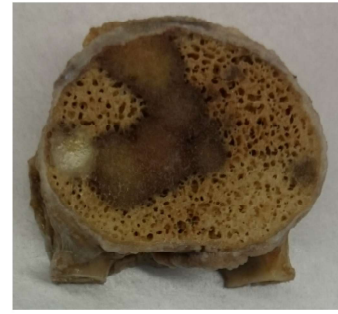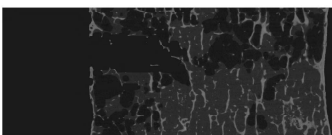

Midplane direction 2

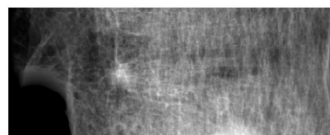

X-ray direction 2

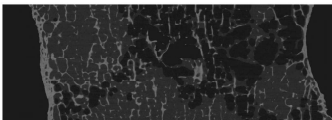

Midplane direction 3

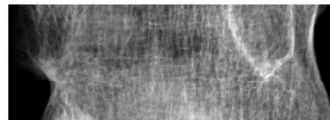

X-ray direction 3

## Sample D 171

Lesion type:

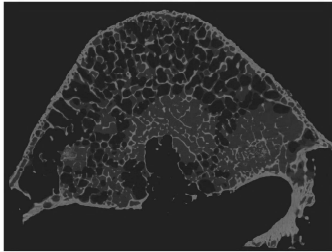

Midplane direction 1

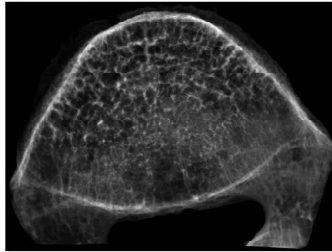

X-ray direction 1

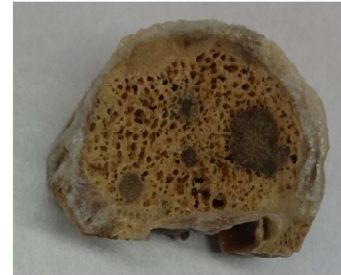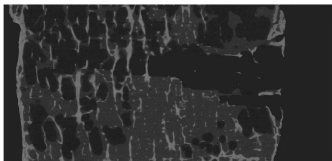

Midplane direction 2

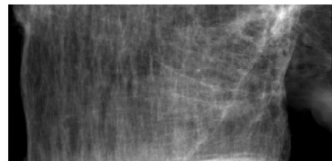

X-ray direction 2

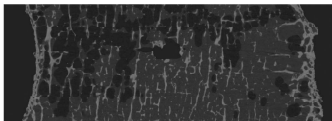

Midplane direction 3

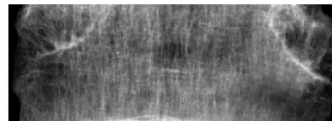

X-ray direction 3

## Sample D 172

Lesion type:

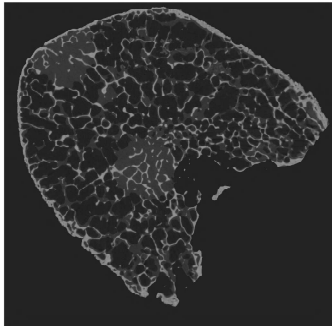

Midplane direction 1

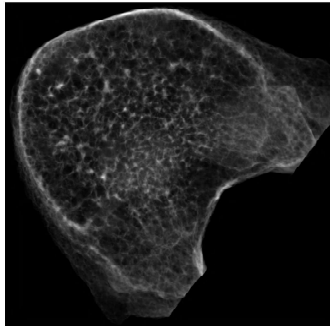

X-ray direction 1

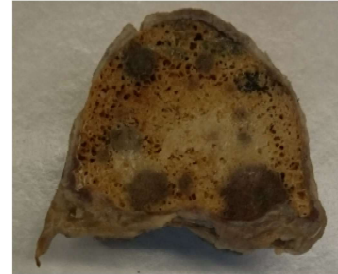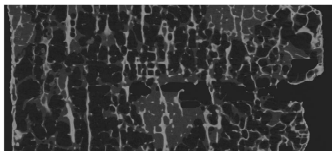

Midplane direction 2

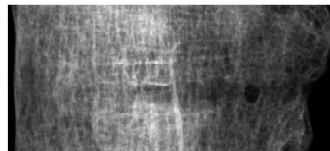

X-ray direction 2

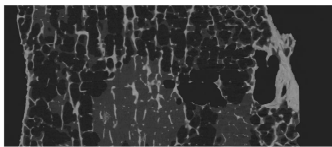

Midplane direction 3

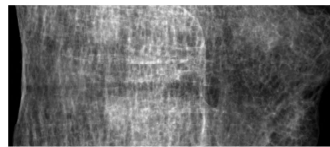

X-ray direction 3

## Sample D 175

Lesion type:

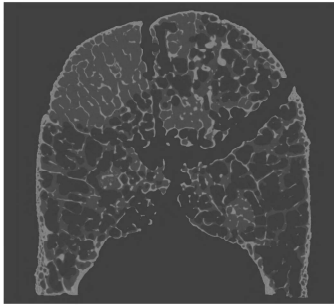

Midplane direction 1

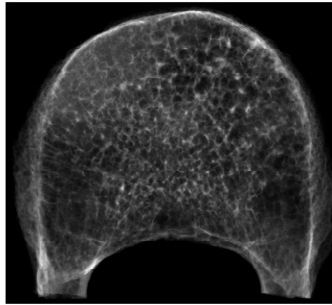

X-ray direction 1

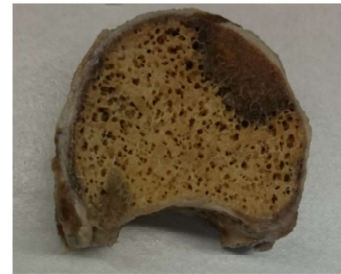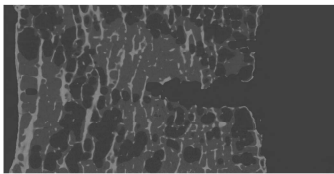

Midplane direction 2

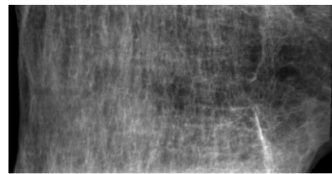

X-ray direction 2

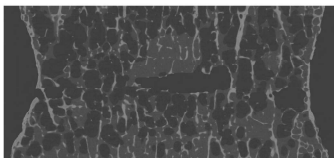

Midplane direction 3

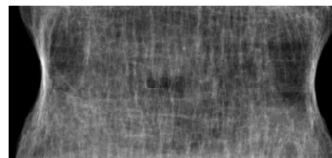

X-ray direction 3

## Sample A 180

### Lesion type:

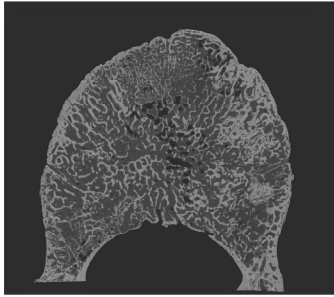

Midplane direction 1

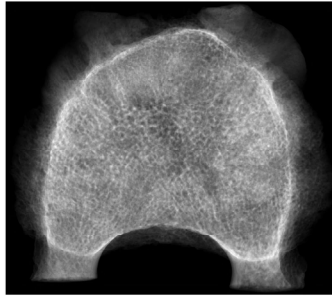

X-ray direction 1

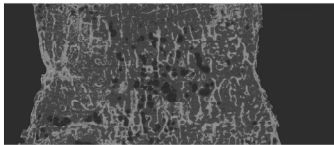

Midplane direction 2

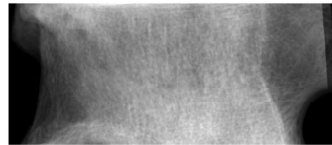

X-ray direction 2

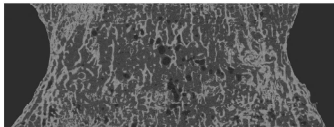

Midplane direction 3

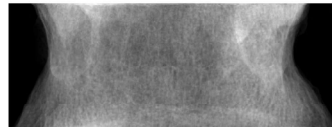

X-ray direction 3



## Sample A 181

Lesion type:

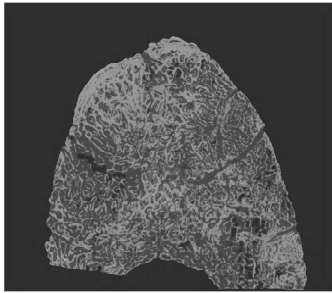

Midplane direction 1

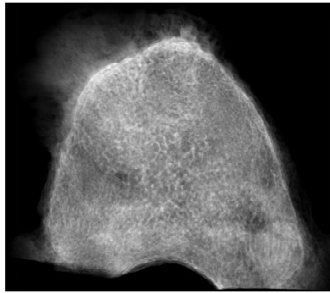

X-ray direction 1

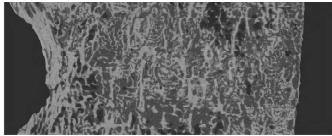

Midplane direction 2

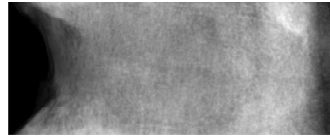

X-ray direction 2

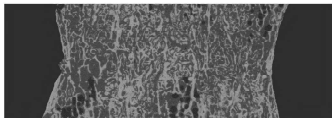

Midplane direction 3

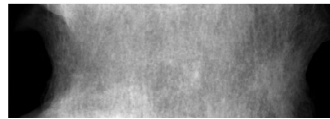

X-ray direction 3

## Sample A 183

Lesion type:

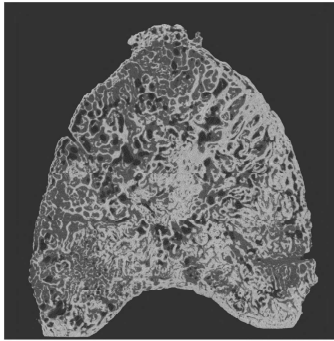

Midplane direction 1

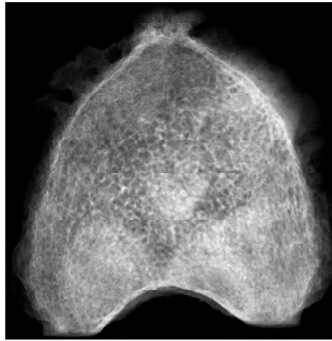

X-ray direction 1

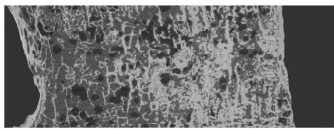

Midplane direction 2

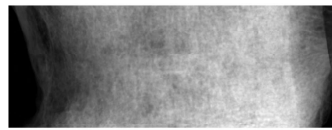

X-ray direction 2

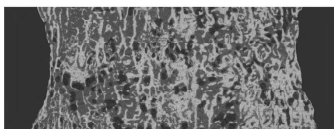

Midplane direction 3

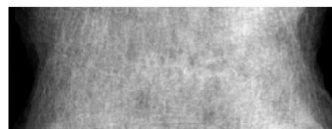

X-ray direction 3

## Sample A 185

### Lesion type:

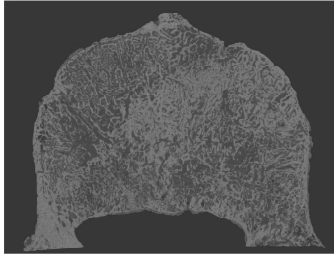

Midplane direction 1

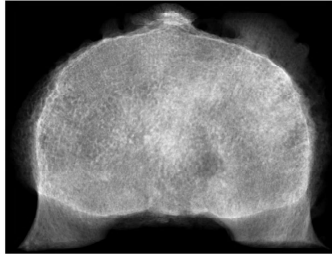

X-ray direction 1

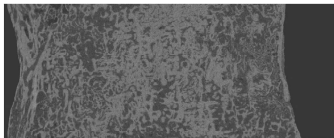

Midplane direction 2

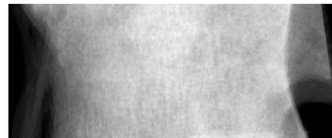

X-ray direction 2

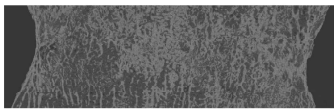

Midplane direction 3

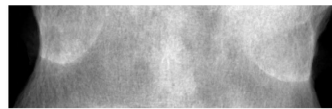

X-ray direction 3

## Sample D 191

Lesion type:

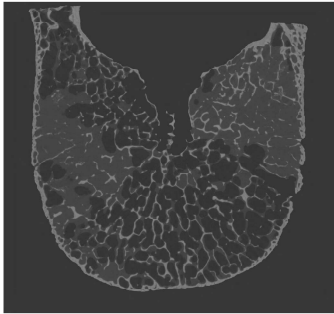

Midplane direction 1

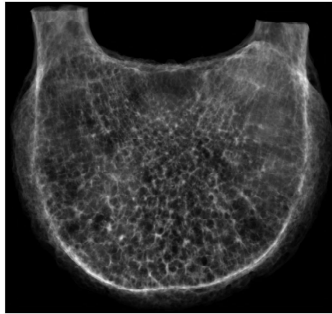

X-ray direction 1

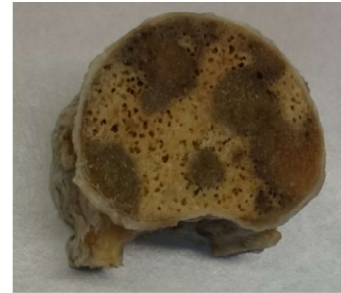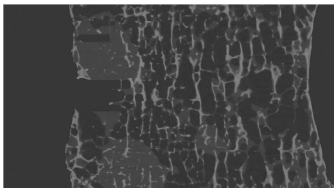

Midplane direction 2

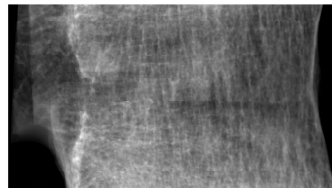

X-ray direction 2

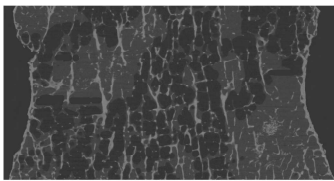

Midplane direction 3

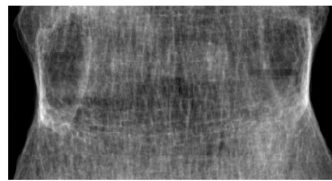

X-ray direction 3

## Sample G 194

### Lesion type:

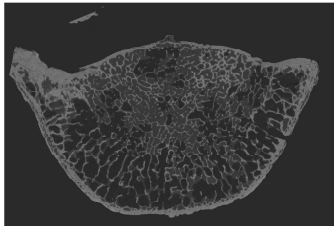

Midplane direction 1

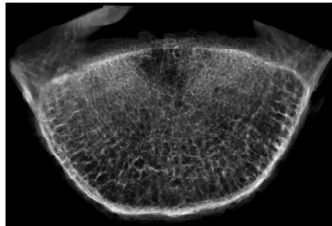

X-ray direction 1

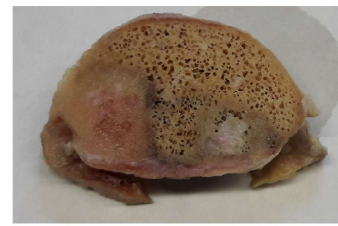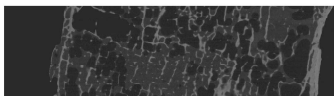

Midplane direction 2

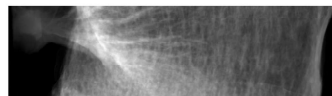

X-ray direction 2

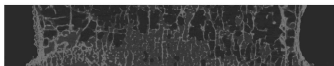

Midplane direction 3

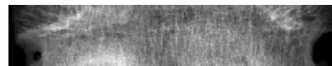

X-ray direction 3

## Sample G 195

Lesion type:

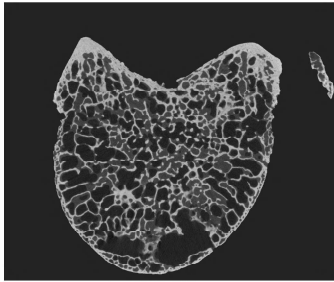

Midplane direction 1

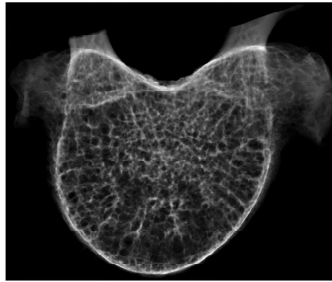

X-ray direction 1

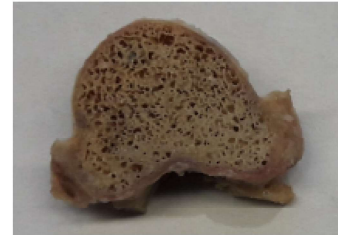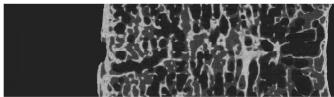

Midplane direction 2

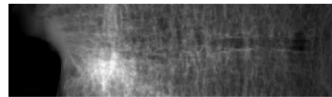

X-ray direction 2

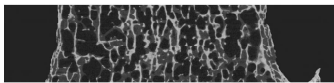

Midplane direction 3

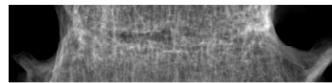

X-ray direction 3

## Sample G 197

### Lesion type:

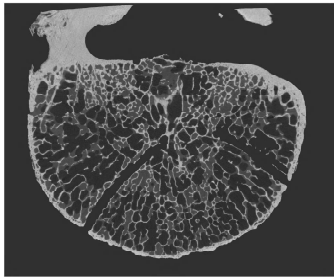

Midplane direction 1

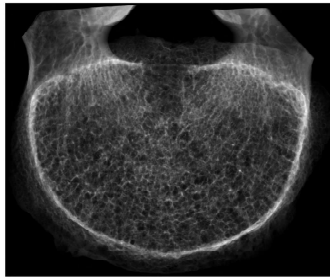

X-ray direction 1

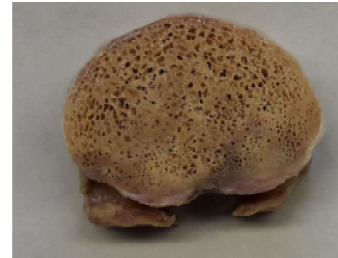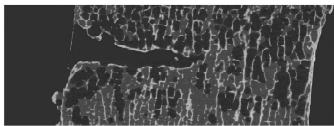

Midplane direction 2

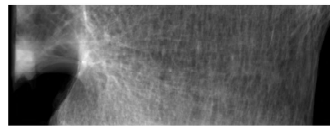

X-ray direction 2

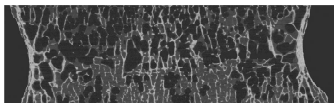

Midplane direction 3

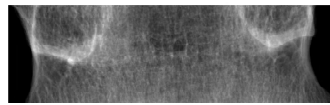

X-ray direction 3

## Sample C 201

Lesion type:

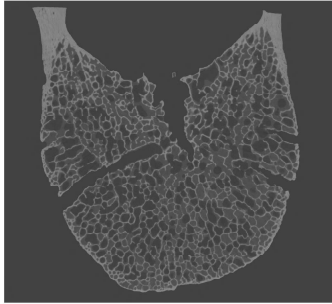

Midplane direction 1

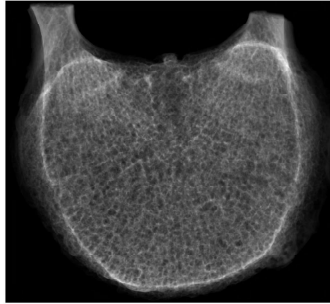

X-ray direction 1

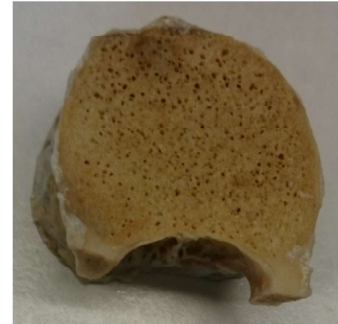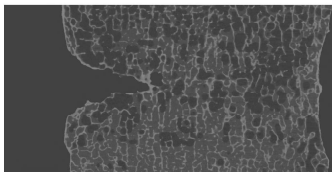

Midplane direction 2

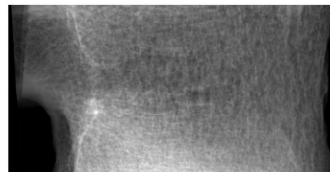

X-ray direction 2

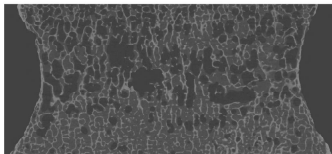

Midplane direction 3

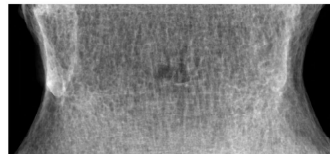

X-ray direction 3



## Sample C 202

Lesion type:

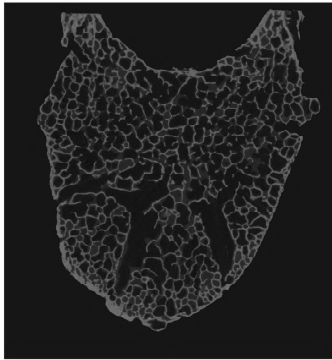

Midplane direction 1

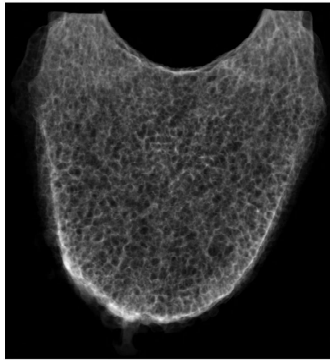

X-ray direction 1

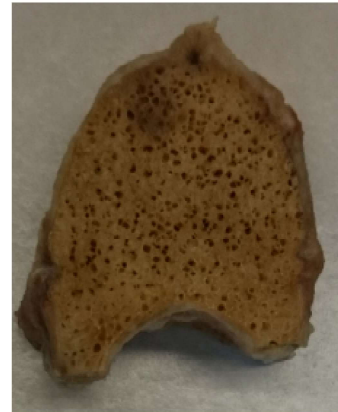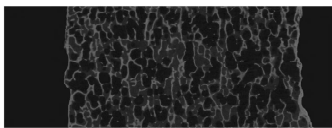

Midplane direction 2

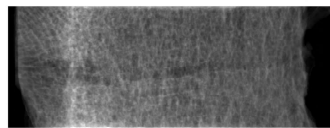

X-ray direction 2

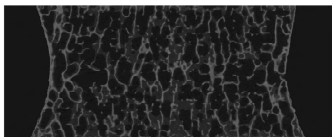

Midplane direction 3

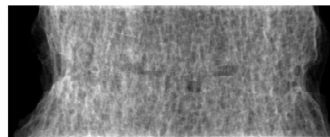

X-ray direction 3

## Sample C 203

Lesion type:

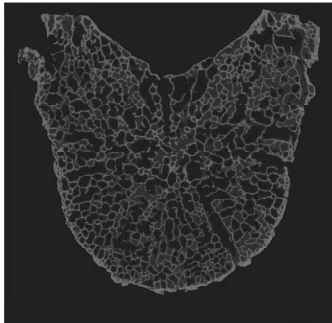

Midplane direction 1

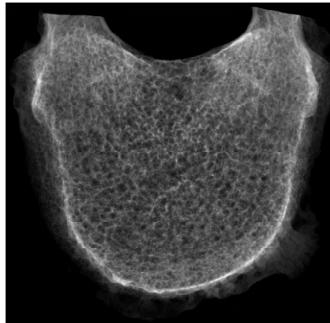

X-ray direction 1

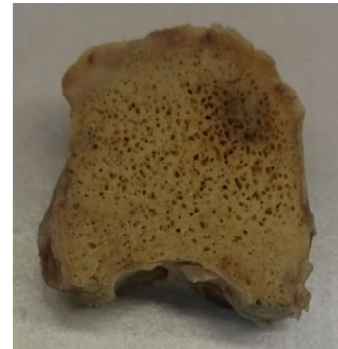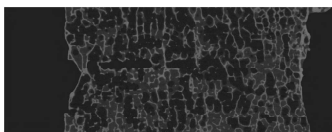

Midplane direction 2

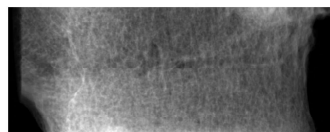

X-ray direction 2

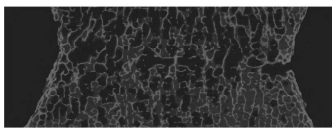

Midplane direction 3

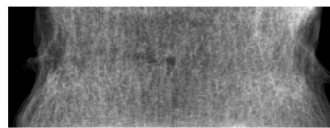

X-ray direction 3

## Sample C 207

Lesion type:

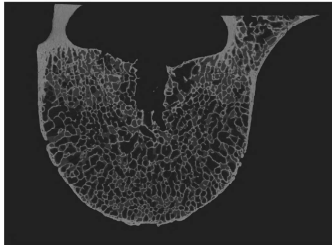

Midplane direction 1

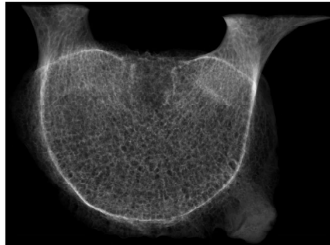

X-ray direction 1

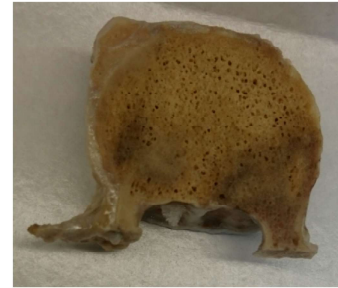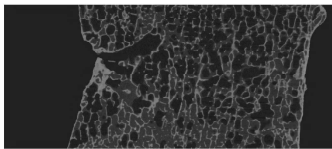

Midplane direction 2

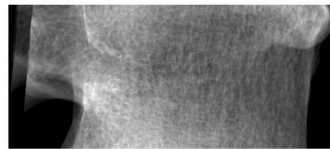

X-ray direction 2

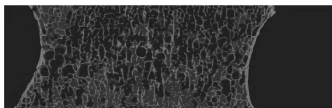

Midplane direction 3

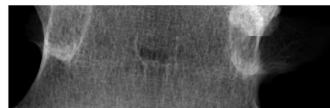

X-ray direction 3

## Sample C 208

Lesion type:

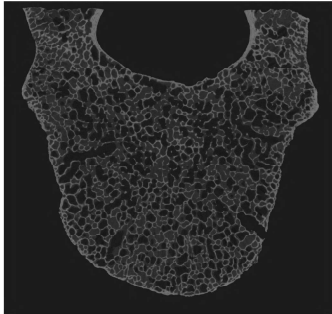

Midplane direction 1

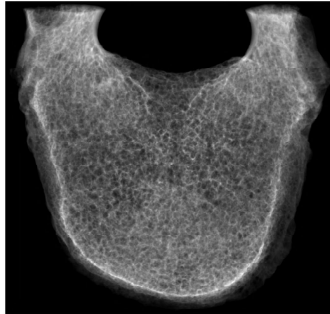

X-ray direction 1

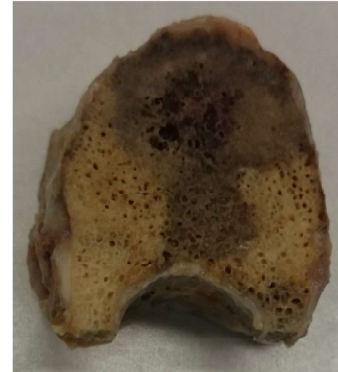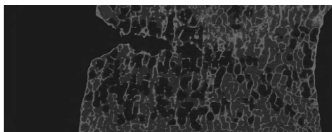

Midplane direction 2

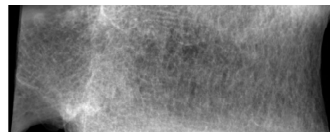

X-ray direction 2

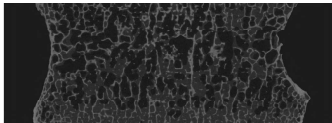

Midplane direction 3

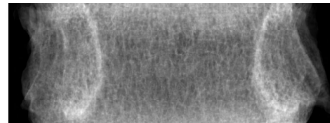

X-ray direction 3

## Sample C 212

### Lesion type:

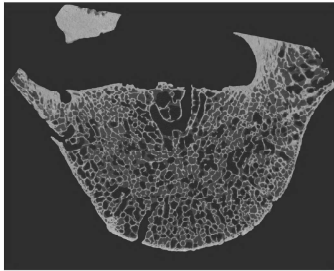

Midplane direction 1

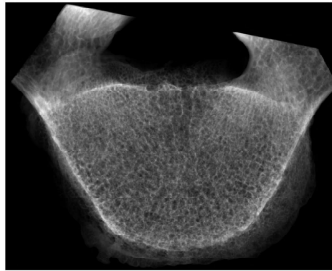

X-ray direction 1

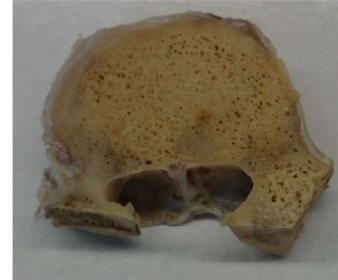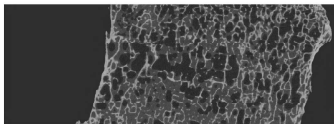

Midplane direction 2

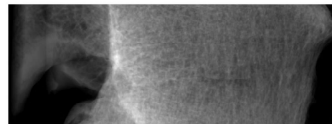

X-ray direction 2

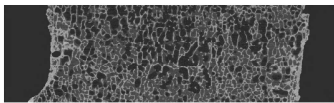

Midplane direction 3

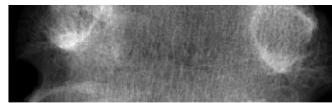

X-ray direction 3

## Sample C 213

Lesion type:

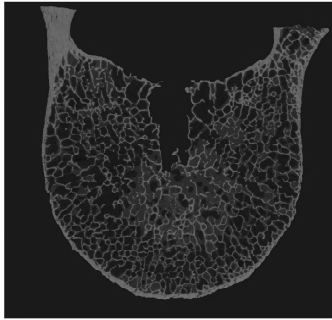

Midplane direction 1

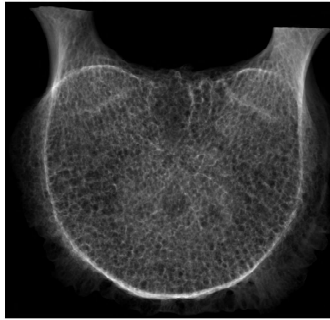

X-ray direction 1

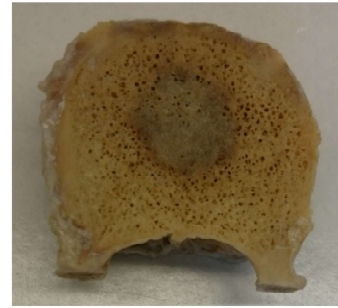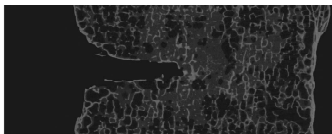

Midplane direction 2

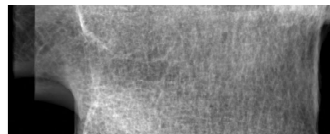

X-ray direction 2

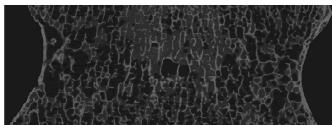

Midplane direction 3

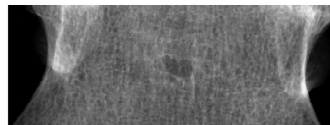

X-ray direction 3

## Sample H 217

Lesion type:

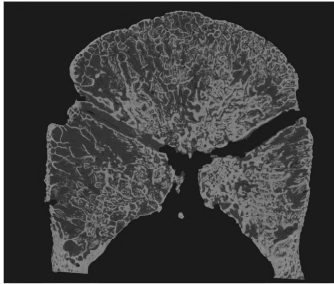

Midplane direction 1

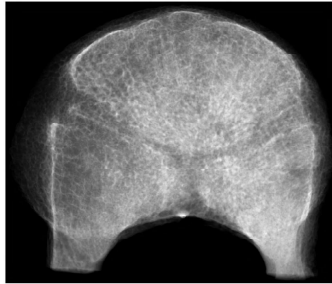

X-ray direction 1

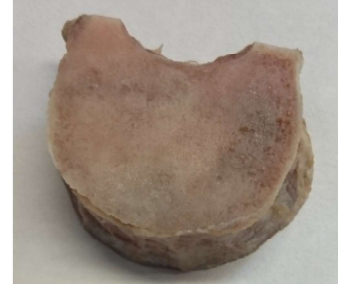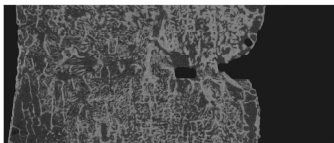

Midplane direction 2

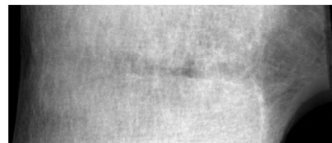

X-ray direction 2

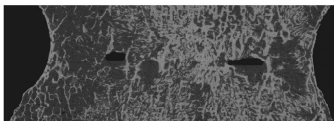

Midplane direction 3

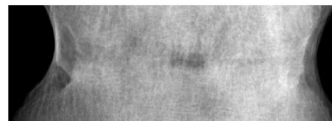

X-ray direction 3

## Sample I 225

Lesion type:

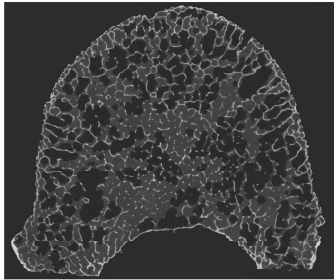

Midplane direction 1

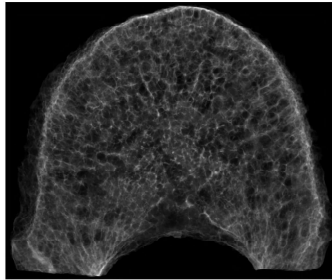

X-ray direction 1

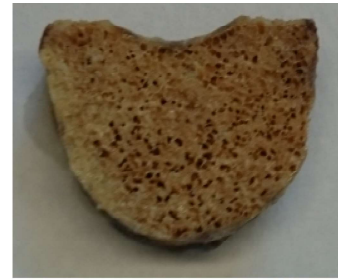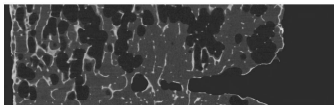

Midplane direction 2

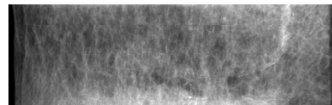

X-ray direction 2

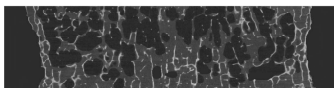

Midplane direction 3

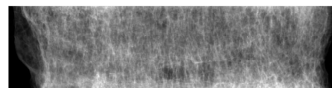

X-ray direction 3



## Sample H 229

Lesion type:

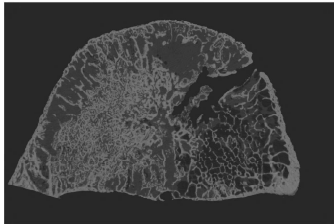

Midplane direction 1

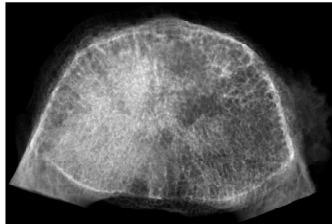

X-ray direction 1

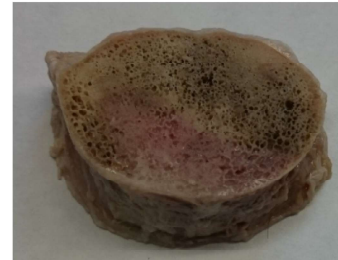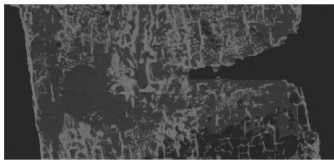

Midplane direction 2

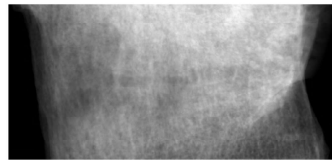

X-ray direction 2

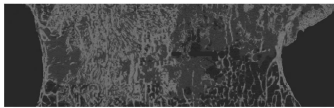

Midplane direction 3

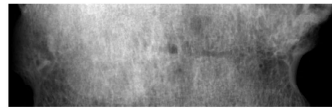

X-ray direction 3

## Sample H 233

Lesion type:

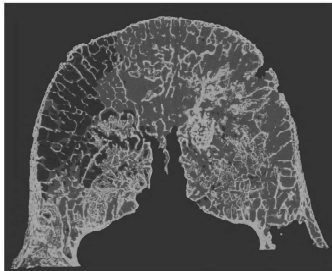

Midplane direction 1

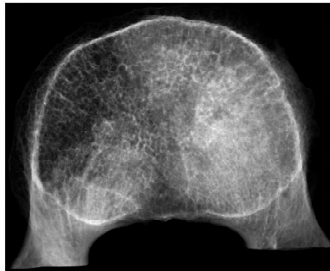

X-ray direction 1

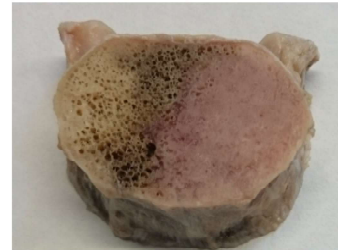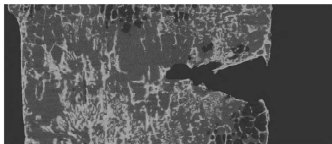

Midplane direction 2

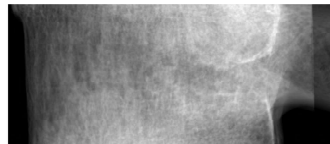

X-ray direction 2

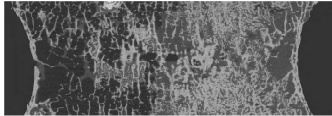

Midplane direction 3

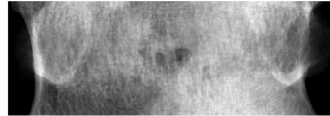

X-ray direction 3

## Sample H 234

Lesion type:

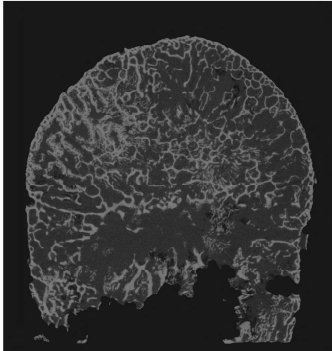

Midplane direction 1

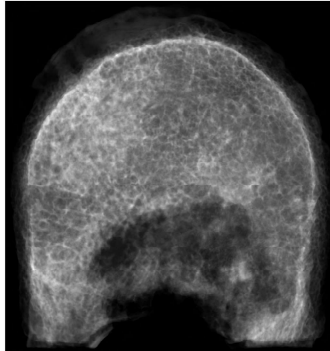

X-ray direction 1

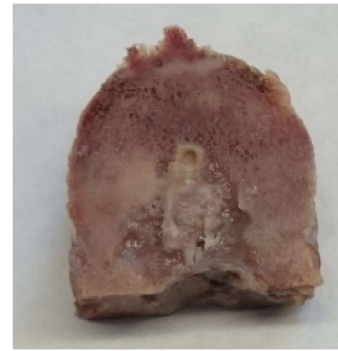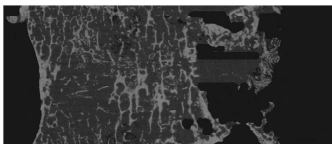

Midplane direction 2

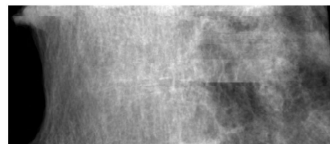

X-ray direction 2

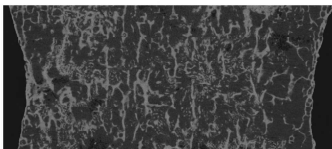

Midplane direction 3

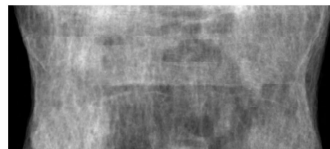

X-ray direction 3

## Sample H 237

Lesion type:

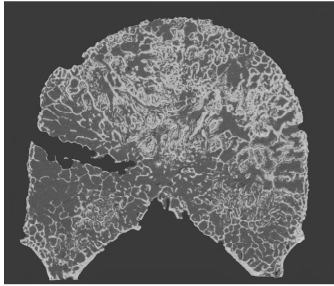

Midplane direction 1

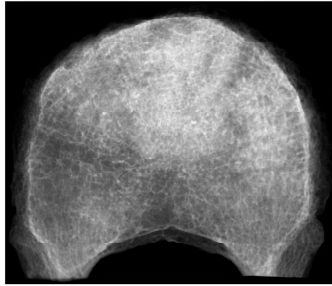

X-ray direction 1

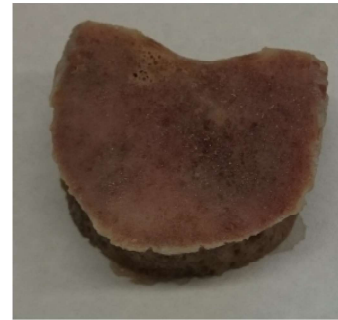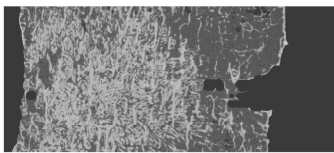

Midplane direction 2

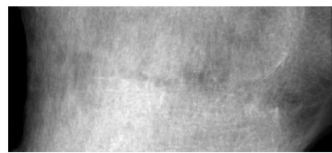

X-ray direction 2

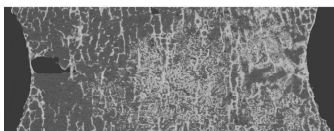

Midplane direction 3

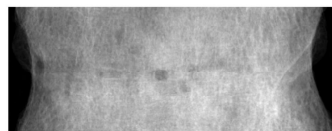

X-ray direction 3

## Sample H 238

Lesion type:

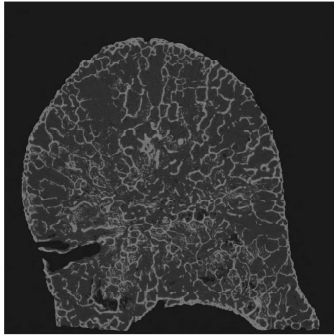

Midplane direction 1

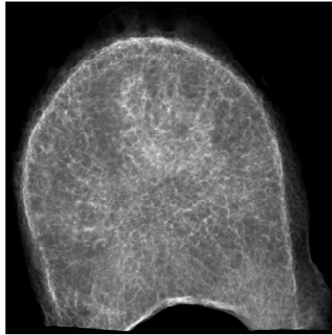

X-ray direction 1

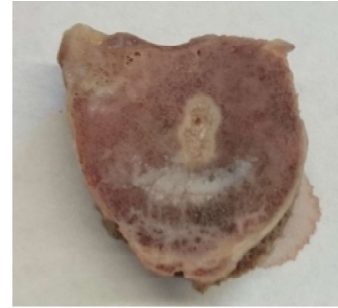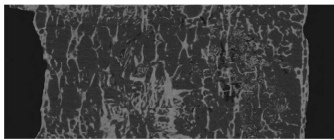

Midplane direction 2

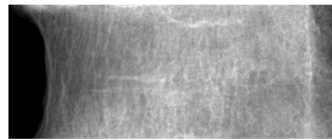

X-ray direction 2

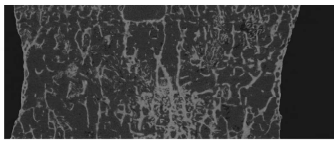

Midplane direction 3

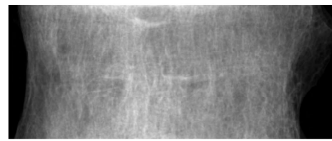

X-ray direction 3

## Sample K 241

Lesion type:

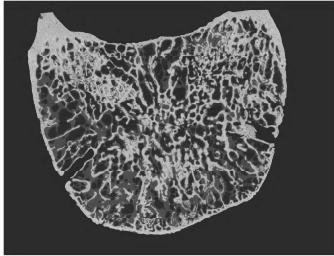

Midplane direction 1

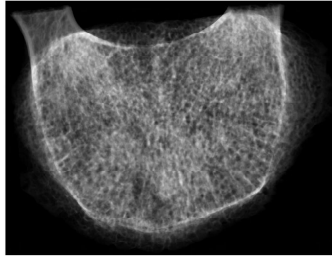

X-ray direction 1

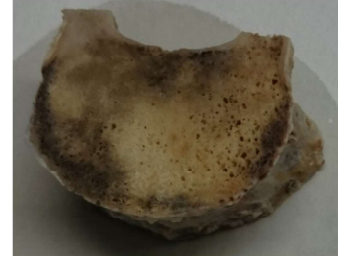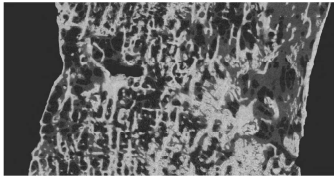

Midplane direction 2

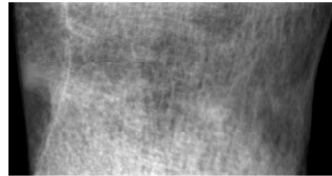

X-ray direction 2

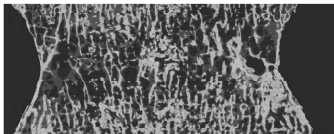

Midplane direction 3

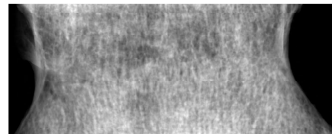

X-ray direction 3

## Sample F 245

Lesion type:

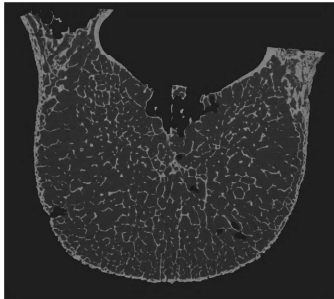

Midplane direction 1

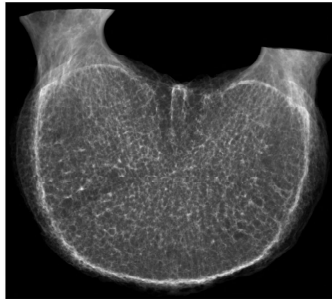

X-ray direction 1

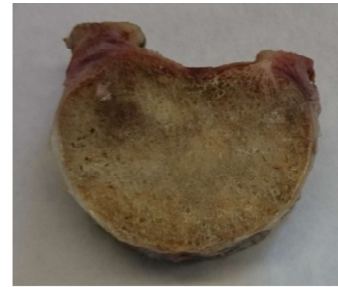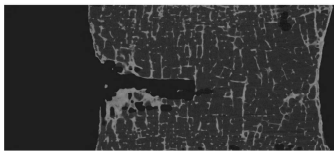

Midplane direction 2

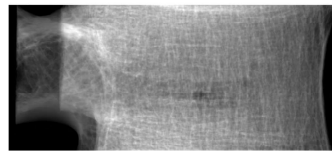

X-ray direction 2

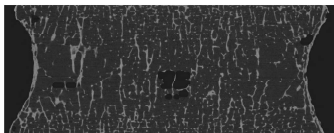

Midplane direction 3

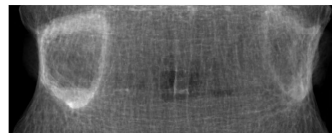

X-ray direction 3

## Sample F 246

Lesion type:

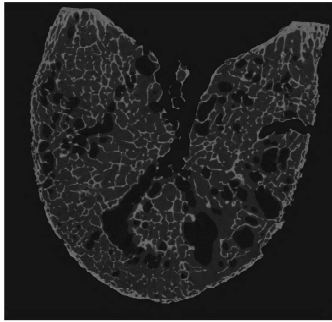

Midplane direction 1

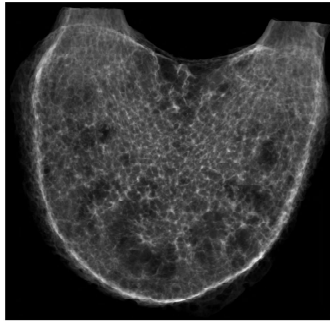

X-ray direction 1

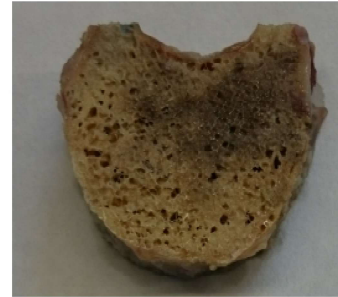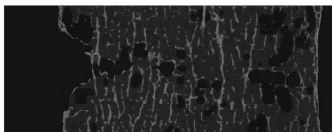

Midplane direction 2

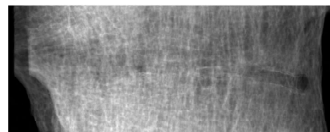

X-ray direction 2

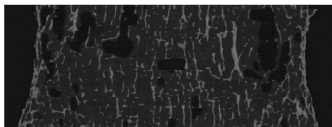

Midplane direction 3

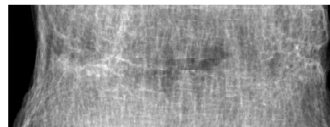

X-ray direction 3



## Sample F 250

Lesion type:

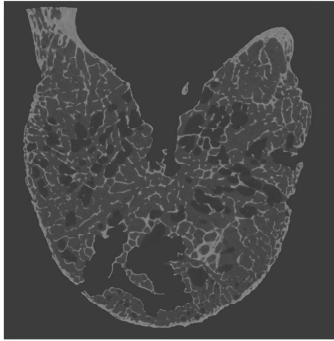

Midplane direction 1

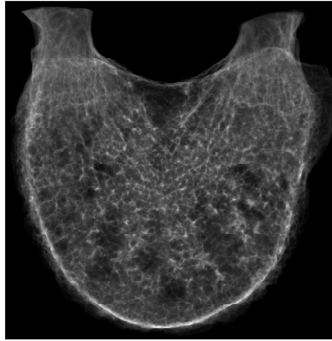

X-ray direction 1

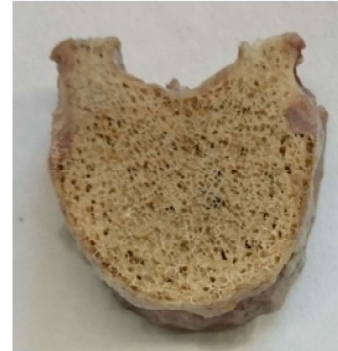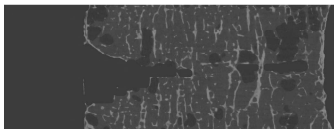

Midplane direction 2

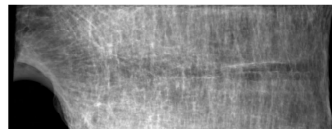

X-ray direction 2

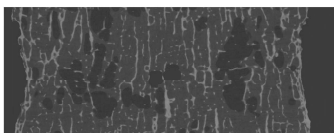

Midplane direction 3

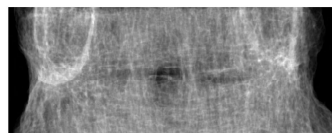

X-ray direction 3

## Sample E 265

Lesion type:

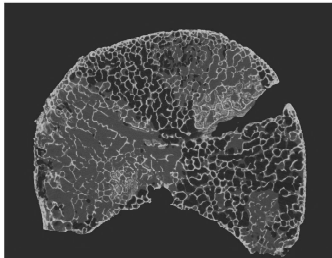

Midplane direction 1

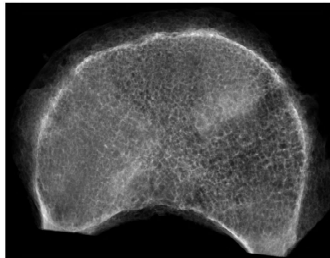

X-ray direction 1

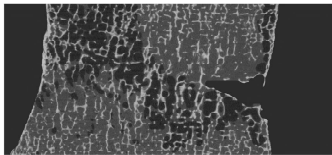

Midplane direction 2

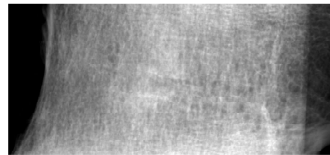

X-ray direction 2

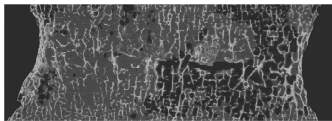

Midplane direction 3

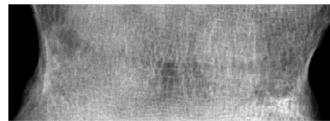

X-ray direction 3

# Sample E 266

Lesion type:

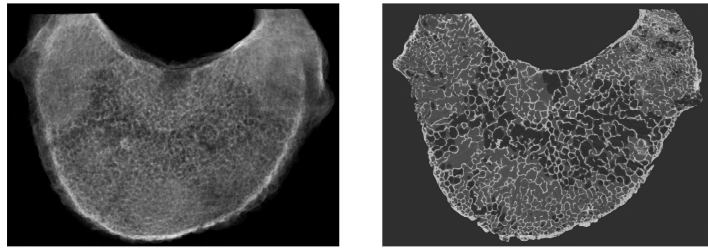

Midplane direction 1

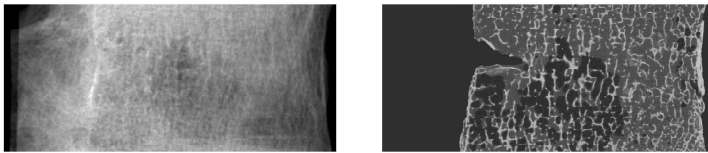

Midplane direction 2

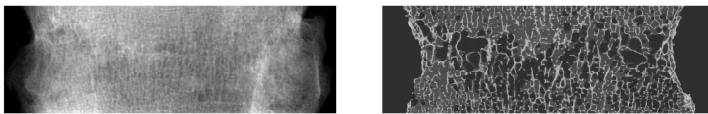

Midplane direction 3

X-ray direction 3

X-ray direction 2

X-ray direction 1

## Sample K 269

Lesion type:

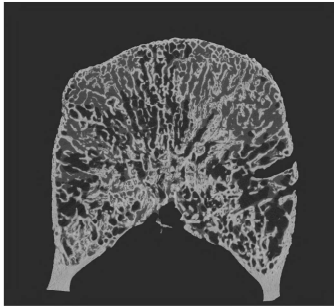

Midplane direction 1

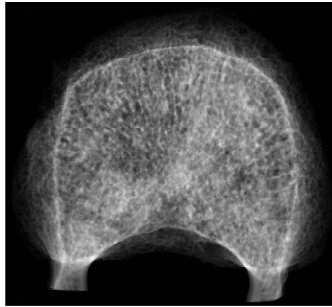

X-ray direction 1

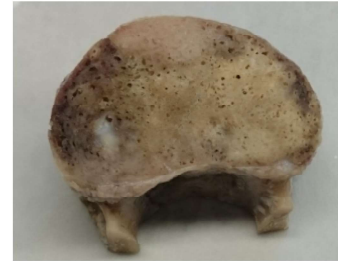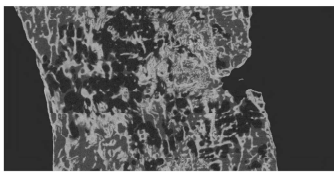

Midplane direction 2

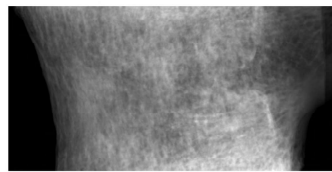

X-ray direction 2

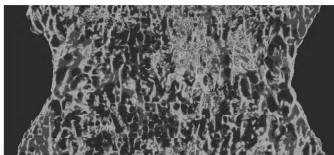

Midplane direction 3

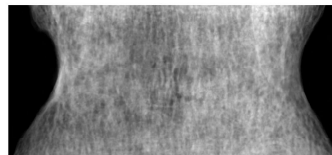

X-ray direction 3

## Sample K 270

Lesion type:

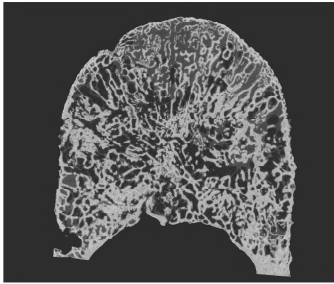

Midplane direction 1

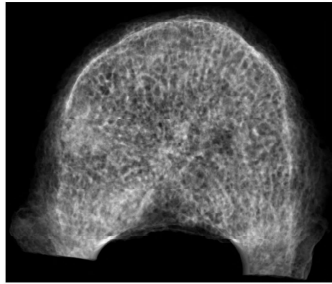

X-ray direction 1

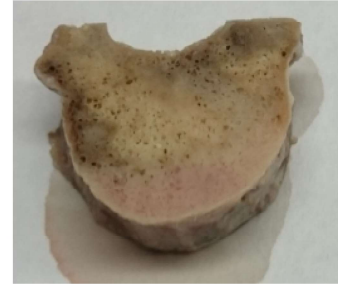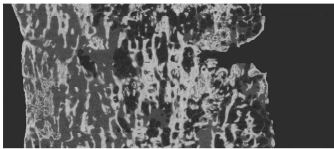

Midplane direction 2

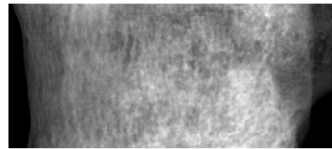

X-ray direction 2

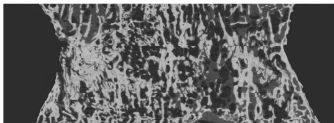

Midplane direction 3

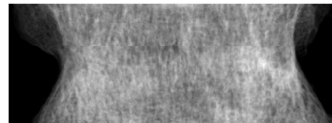

X-ray direction 3

## Sample K 273

Lesion type:

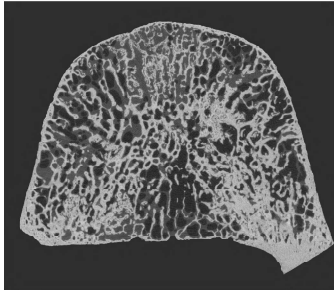

Midplane direction 1

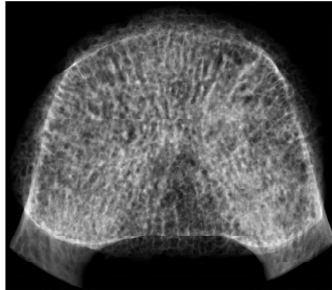

X-ray direction 1

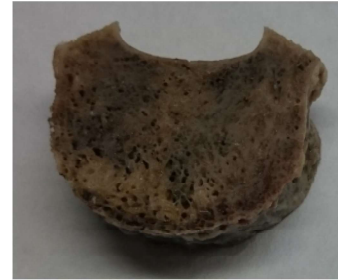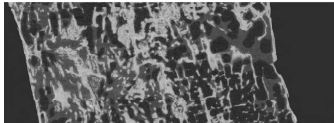

Midplane direction 2

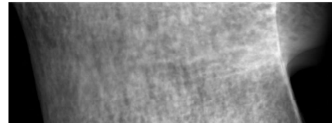

X-ray direction 2

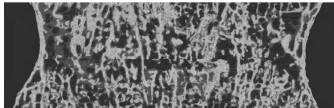

Midplane direction 3

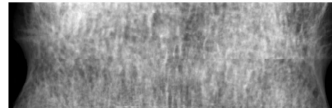

X-ray direction 3

## Sample K 274

Lesion type:

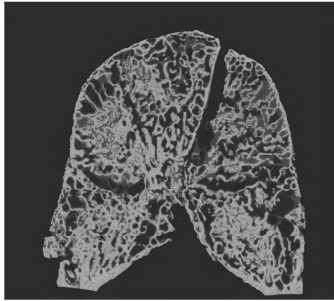

Midplane direction 1

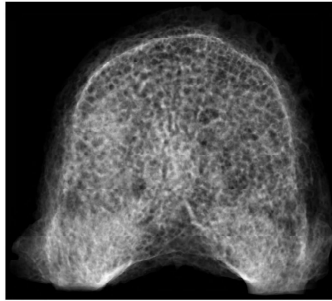

X-ray direction 1

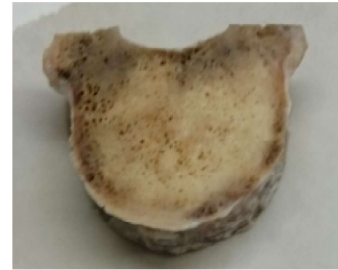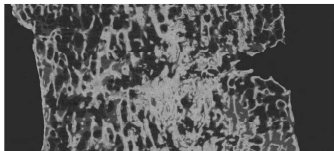

Midplane direction 2

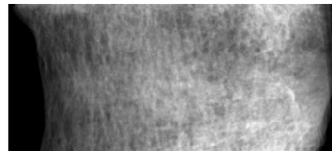

X-ray direction 2

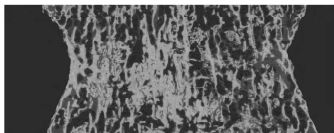

Midplane direction 3

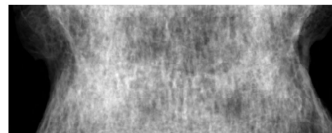

X-ray direction 3

## Sample B 280

Lesion type:

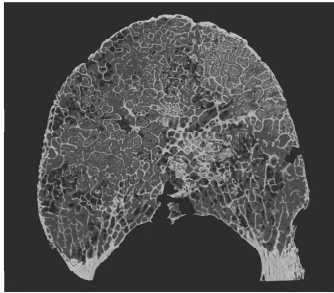

Midplane direction 1

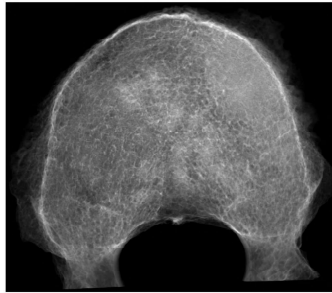

X-ray direction 1

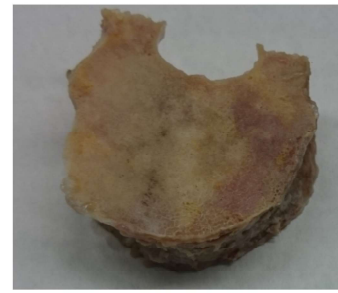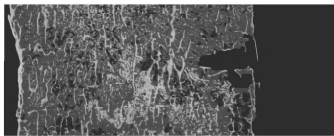

Midplane direction 2

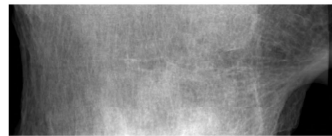

X-ray direction 2

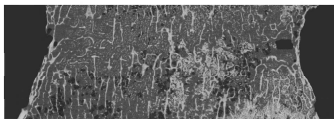

Midplane direction 3

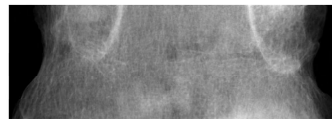

X-ray direction 3



## Sample B 283

Lesion type:

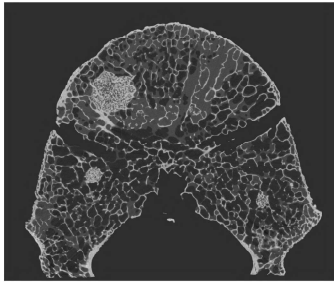

Midplane direction 1

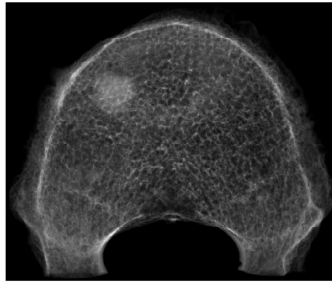

X-ray direction 1

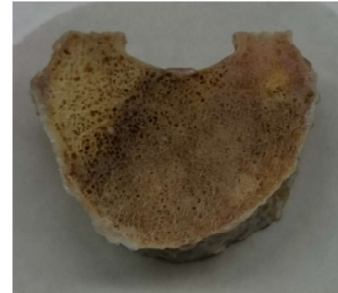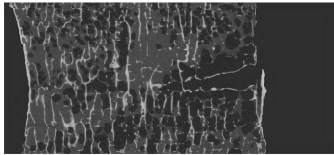

Midplane direction 2

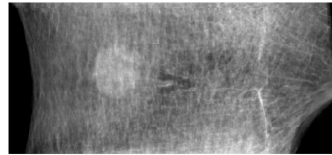

X-ray direction 2

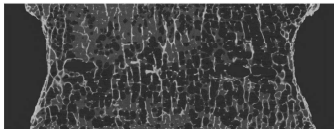

Midplane direction 3

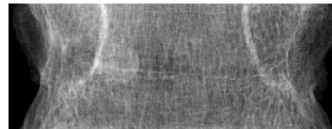

X-ray direction 3

## Sample B 284

Lesion type:

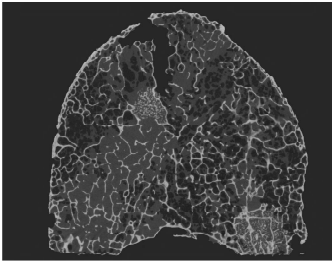

Midplane direction 1

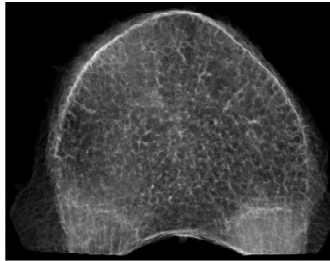

X-ray direction 1

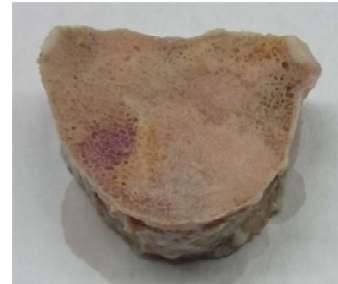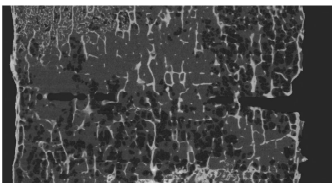

Midplane direction 2

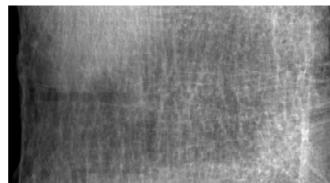

X-ray direction 2

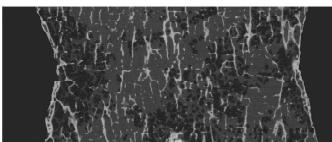

Midplane direction 3

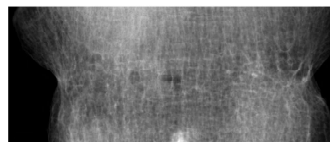

X-ray direction 3

# Sample B 286

Lesion type:

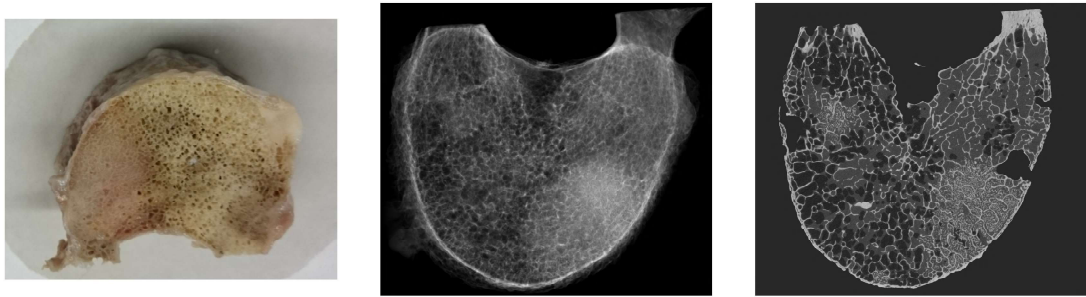

Midplane direction 3

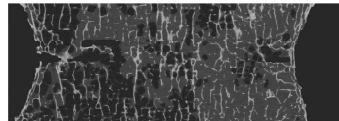

Midplane direction 2

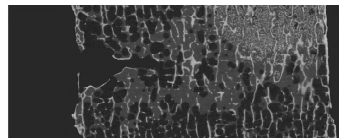

Midplane direction 1

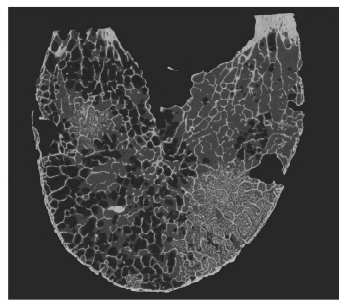

X-ray direction 3

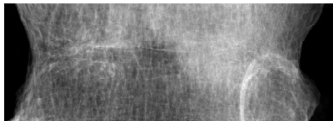

X-ray direction 2

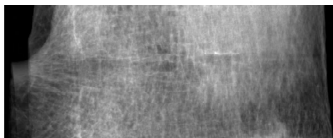

X-ray direction 1

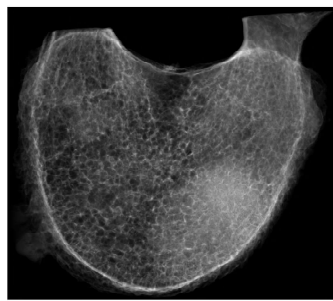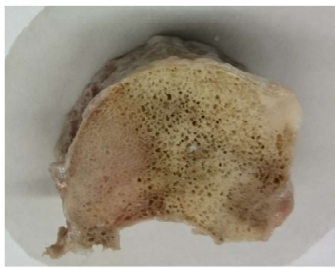

## Sample E 290

Lesion type:

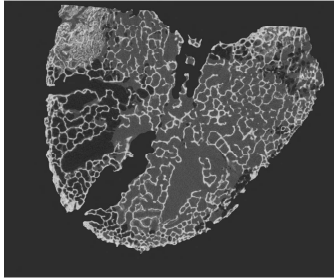

Midplane direction 1

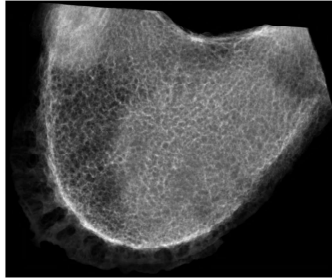

X-ray direction 1

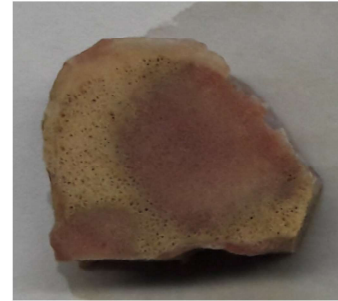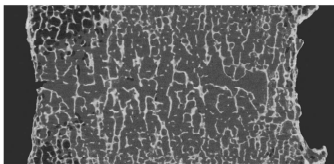

Midplane direction 2

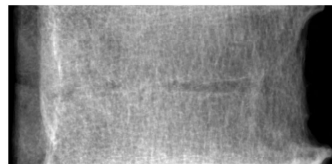

X-ray direction 2

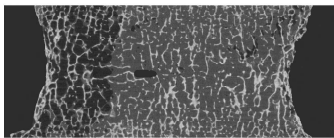

Midplane direction 3

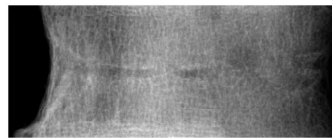

X-ray direction 3

## Sample J 293

Lesion type:

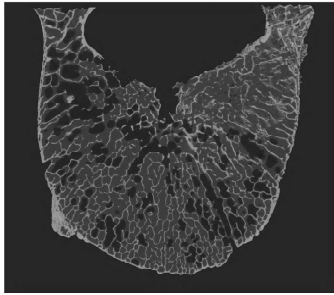

Midplane direction 1

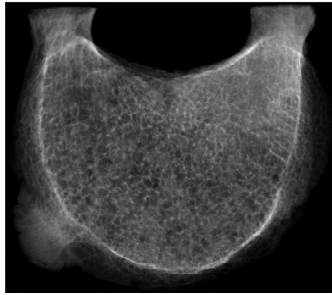

X-ray direction 1

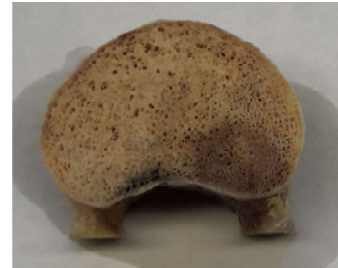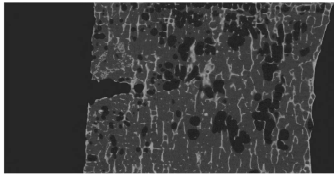

Midplane direction 2

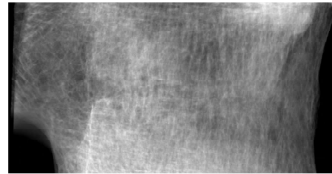

X-ray direction 2

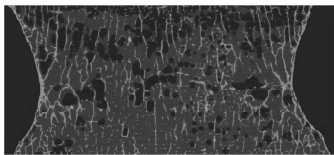

Midplane direction 3

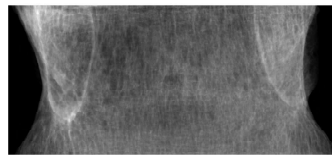

X-ray direction 3

# Sample J 294

Lesion type:

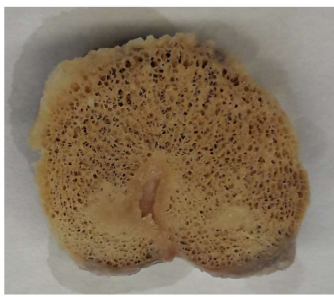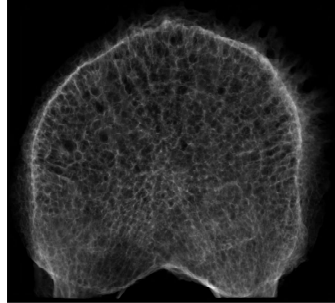

X-ray direction 1

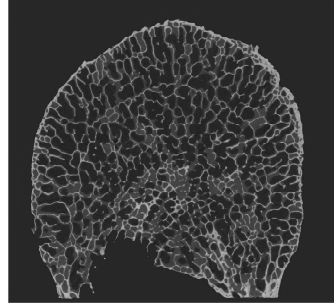

Midplane direction 1

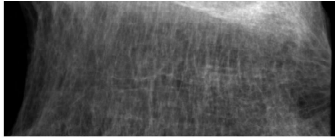

X-ray direction 2

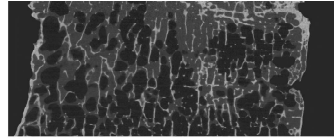

Midplane direction 2

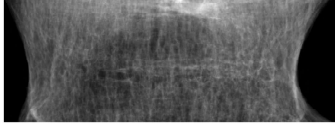

X-ray direction 3

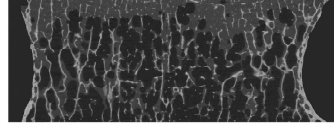

Midplane direction 3

## Sample J 302

Lesion type:

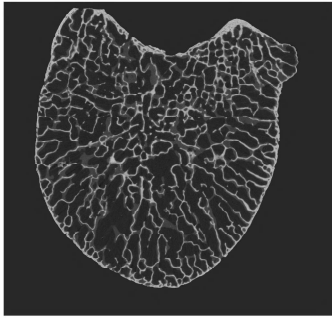

Midplane direction 1

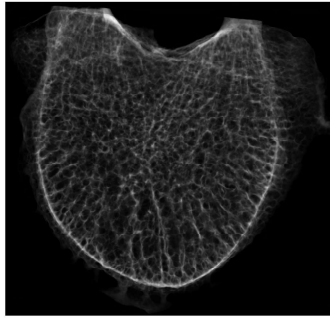

X-ray direction 1

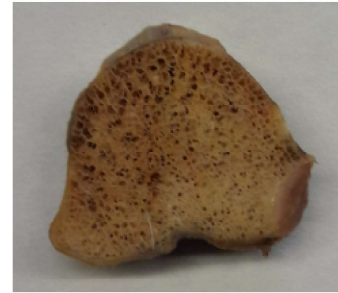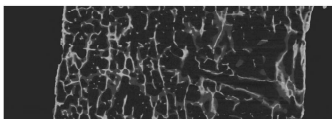

Midplane direction 2

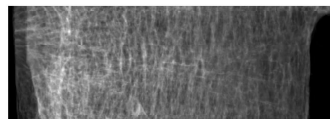

X-ray direction 2

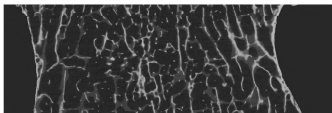

Midplane direction 3

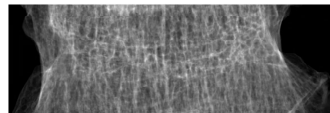

X-ray direction 3
